# Supplementary material for: Large-scale investigation of oxygen response mutants in Saccharomyces cerevisiae
Source: Royal Society of Chemistry journal article supplement (doi:10.1039/c3mb25516f), 2013-02-22
Supplement: c3mb25516f.pdf [file c3mb25516f.pdf]

**Gene deletion strains identified in this study that grew poorly under anoxic conditions**

**Average colony size reduction under anoxic condition (3 replicates). The values are shown in percentage. Darker colour represents higher sensitivity.**

|        |           |       |
|--------|-----------|-------|
| AAC1   | YMR056C   | 51.73 |
| ADH1   | YOL086C   | 33.18 |
| ADK2   | YER170W   | 20.46 |
| ALK1   | YGL021W   | 72.70 |
| APA1   | YCL050C   | 27.04 |
| APS2   | YJR058C   | 39.53 |
| APS3   | YJL024C   | 42.42 |
| ASF2   | YDL197C   | 37.48 |
| ATX1   | YNL259C   | 20.60 |
| AZF1   | YOR113W   | 23.08 |
| BIO3   | YNR058W   | 44.04 |
| BUD3   | YCL014W   | 40.73 |
| CAF120 | YNL278W   | 32.89 |
| CDC26  | YFR036W   | 60.70 |
| CIN4   | YMR138W   | 38.68 |
| CLA4   | YNL298W   | 26.04 |
| CNM67  | YNL225C   | 24.91 |
| COD3   | YGL223C   | 82.58 |
| COS10  | YNR075W   | 19.48 |
| COX5A  | YNL052W   | 39.71 |
| COX7   | YMR256C   | 34.81 |
| CPA1   | YOR303W   | 20.60 |
| CSM2   | YIL132C   | 25.62 |
| CSR1   | YLR380W   | 22.58 |
| CSR2   | YPR030W   | 38.18 |
| CST9   | YLR394W   | 19.88 |
| CTF18  | YMR078C   | 50.54 |
| CTS1   | YLR286C   | 23.15 |
| CYC2   | YOR037W   | 38.03 |
| CYC7   | YEL039C   | 25.67 |
| CYK3   | YDL117W   | 43.69 |
| DAK1   | YML070W   | 59.02 |
| DAL4   | YIR028W   | 43.55 |
| DAP2   | YHR028C   | 56.89 |
| DBR1   | YKL149C   | 38.04 |
| DGA1   | YOR245C   | 41.64 |
| DIA2   | YOR080W   | 25.69 |
| DID2   | YKR035W-A | 24.00 |
| DMC1   | YER179W   | 58.93 |
| DOG2   | YHR043C   | 56.04 |
| DON1   | YDR273W   | 77.42 |
| DPB4   | YDR121W   | 40.44 |
| DUN1   | YDL101C   | 60.62 |
| DUR1,2 | YBR208C   | 17.55 |
| DYN2   | YDR424C   | 38.11 |
| EAP1   | YKL204W   | 39.74 |
| ECM2   | YBR065C   | 25.62 |
| ECM31  | YBR176W   | 35.54 |
| EFT2   | YDR385W   | 72.84 |

|       |           |       |
|-------|-----------|-------|
| ELP6  | YMR312W   | 28.09 |
| EMP46 | YLR080W   | 24.49 |
| EPT1  | YHR123W   | 58.66 |
| ERG24 | YNL280C   | 66.91 |
| ERV29 | YGR284C   | 18.11 |
| FAA4  | YMR246W   | 44.46 |
| FAB1  | YFR019W   | 44.89 |
| FAR3  | YMR052W   | 35.00 |
| FCY21 | YER060W   | 43.42 |
| FIT2  | YOR382W   | 28.16 |
| FKH2  | YNL068C   | 55.20 |
| FRM2  | YCL026C-A | 30.70 |
| FUI1  | YBL042C   | 45.17 |
| FUS1  | YCL027W   | 30.00 |
| FYV2  | YIL054W   | 30.28 |
| GAL11 | YOL051W   | 54.06 |
| GAL3  | YDR009W   | 19.34 |
| GAP1  | YKR039W   | 41.29 |
| GAT4  | YIR013C   | 33.80 |
| GGA2  | YHR108W   | 67.48 |
| GPD2  | YOL059W   | 39.72 |
| GPH1  | YPR160W   | 41.64 |
| GUP1  | YGL084C   | 45.73 |
| HAP1  | YLR256W   | 25.37 |
| HAP3  | YBL021C   | 26.78 |
| HAP4  | YKL109W   | 39.66 |
| HAP5  | YOR358W   | 23.44 |
| HOC1  | YJR075W   | 28.44 |
| HOM6  | YJR139C   | 40.44 |
| HRT2  | YMR027W   | 57.60 |
| HUT1  | YPL244C   | 23.42 |
| IAH1  | YOR126C   | 60.49 |
| IDP3  | YNL009W   | 48.11 |
| IES6  | YEL044W   | 46.30 |
| INP53 | YOR109W   | 32.46 |
| JLP1  | YLL057C   | 32.53 |
| KAR5  | YMR065W   | 61.55 |
| KGD2  | YDR148C   | 38.75 |
| KHA1  | YJL094C   | 61.76 |
| KSP1  | YHR082C   | 70.86 |
| KTR2  | YKR061W   | 24.35 |
| KTR3  | YBR205W   | 17.64 |
| LIP2  | YLR239C   | 60.13 |
| LYS1  | YIR034C   | 18.62 |
| MAC1  | YMR021C   | 46.30 |
| MAI1  | YPL100W   | 38.75 |
| MAK3  | YPR051W   | 28.51 |
| MCH4  | YOL119C   | 25.48 |
| MCK1  | YNL307C   | 19.40 |
| MEI5  | YPL121C   | 46.31 |
| MEP3  | YPR138C   | 43.48 |
| MET32 | YDR253C   | 69.04 |
| MGA1  | YGR249W   | 45.95 |
| MGA2  | YIR033W   | 43.97 |
| MIC17 | YMR002W   | 38.82 |

|        |           |       |
|--------|-----------|-------|
| MIG1   | YGL055C   | 75.10 |
| MIP6   | YHR015W   | 57.24 |
| MKT1   | YNL085W   | 54.49 |
| MLC2   | YPR188C   | 50.75 |
| MLH1   | YMR167W   | 38.82 |
| MNN10  | YDR245W   | 87.24 |
| MNS1   | YJR131W   | 18.49 |
| MOT3   | YMR070W   | 47.29 |
| MSL1   | YIR009W   | 30.20 |
| MSN5   | YDR335W   | 75.95 |
| MTD1   | YKR080W   | 23.22 |
| NAP1   | YKR048C   | 35.00 |
| NDE1   | YMR145C   | 27.74 |
| NIT1   | YIL164C   | 43.06 |
| NPL3   | YDR432W   | 67.13 |
| OPI3   | YJR073C   | 28.37 |
| OSM1   | YJR051W   | 25.40 |
| OYE2   | YHR179W   | 38.82 |
| PAU20  | YOL161C   | 23.21 |
| PAU7   | YAR020C   | 27.80 |
| PCL8   | YPL219W   | 37.69 |
| PDC6   | YGR087C   | 57.10 |
| PET18  | YCR020C   | 21.17 |
| PEX3   | YDR329C   | 41.15 |
| PEX6   | YNL329C   | 19.53 |
| PHM7   | YOL084W   | 25.40 |
| PHO4   | YFR034C   | 26.53 |
| PIB2   | YGL023C   | 94.98 |
| PMT2   | YAL023C   | 25.06 |
| POP2   | YNR052C   | 41.34 |
| PPS1   | YBR276C   | 70.37 |
| PRM7   | YDL039C   | 47.22 |
| PRR2   | YDL214C   | 47.00 |
| PUT3   | YKL015W   | 22.02 |
| QCR9   | YGR183C   | 43.13 |
| QRI8   | YMR022W   | 42.70 |
| RAD16  | YBR114W   | 27.55 |
| RAD55  | YDR076W   | 26.40 |
| RAV2   | YDR202C   | 36.06 |
| RGA1   | YOR127W   | 41.29 |
| RHO2   | YNL090W   | 29.00 |
| RIM20  | YOR275C   | 54.35 |
| RLF2   | YPR018W   | 55.26 |
| RNQ1   | YCL028W   | 26.47 |
| ROX1   | YPR065W   | 45.77 |
| RPA14  | YDR156W   | 24.62 |
| RPD3   | YNL330C   | 31.27 |
| RPL19A | YBR084C-A | 52.80 |
| RPL1A  | YPL220W   | 20.58 |
| RPL26A | YLR344W   | 37.06 |
| RPS8A  | YBL072C   | 19.24 |
| RRM3   | YHR031C   | 55.34 |
| RSA3   | YLR221C   | 40.16 |
| RTT106 | YNL206C   | 34.22 |
| RUD3   | YOR216C   | 26.33 |

|         |         |       |
|---------|---------|-------|
| RVS161  | YCR009C | 17.58 |
| SAC2    | YDR484W | 31.90 |
| SCD6    | YPR129W | 26.54 |
| SDC25   | YLL016W | 20.11 |
| SDH1    | YKL148C | 39.80 |
| SDH2    | YLL041C | 31.84 |
| SEC22   | YLR268W | 22.21 |
| SER1    | YOR184W | 41.65 |
| SFC1    | YJR095W | 26.60 |
| SGN1    | YIR001C | 45.31 |
| SGS1    | YMR190C | 25.13 |
| SIC1    | YLR079W | 22.31 |
| SIS2    | YKR072C | 49.42 |
| SKS1    | YPL026C | 42.91 |
| SLY41   | YOR307C | 17.86 |
| SNF3    | YDL194W | 27.46 |
| SNQ2    | YDR011W | 24.18 |
| SPF1    | YEL031W | 70.09 |
| SPO11   | YHL022C | 62.47 |
| SPO69   | YPR007C | 49.62 |
| SPT4    | YGR063C | 39.38 |
| SSD1    | YDR293C | 96.01 |
| SSF2    | YDR312W | 84.49 |
| STE24   | YJR117W | 35.57 |
| STV1    | YMR054W | 36.84 |
| SUM1    | YDR310C | 77.86 |
| SYT1    | YPR095C | 19.97 |
| TOS4    | YLR183C | 51.82 |
| TRK1    | YJL129C | 29.71 |
| TRM2    | YKR056W | 27.82 |
| TRP4    | YDR354W | 81.17 |
| TRR2    | YHR106W | 61.69 |
| TSA2    | YDR453C | 29.66 |
| TYR1    | YBR166C | 39.95 |
| UBA3    | YPR066W | 26.68 |
| UBC5    | YDR059C | 43.91 |
| UBP3    | YER151C | 22.09 |
| UBX2    | YML013W | 24.59 |
| URA1    | YKL216W | 23.95 |
| URA2    | YJL130C | 25.76 |
| UTR5    | YEL035C | 27.20 |
| VAM3    | YOR106W | 30.98 |
| VMA4    | YOR332W | 22.86 |
| VPS35   | YJL154C | 31.20 |
| VPS41   | YDR080W | 40.66 |
| VPS62   | YGR141W | 42.77 |
| VPS64   | YDR200C | 63.66 |
| VPS74   | YDR372C | 80.60 |
| VPS8    | YAL002W | 23.86 |
| VTA1    | YLR181C | 52.44 |
| VTC1    | YER072W | 41.22 |
| VTS1    | YOR359W | 43.60 |
| WSS1    | YHR134W | 56.47 |
| YAF9    | YNL107W | 51.95 |
| YAL027W | YAL027W | 21.17 |

|         |         |       |
|---------|---------|-------|
| YAL066W | YAL066W | 39.46 |
| YAR030C | YAR030C | 22.58 |
| YBL055C | YBL055C | 32.04 |
| YBR022W | YBR022W | 25.62 |
| YBR100W | YBR100W | 32.18 |
| YBR219C | YBR219C | 39.35 |
| YBR225W | YBR225W | 19.58 |
| YBR238C | YBR238C | 32.33 |
| YCL013W | YCL013W | 39.82 |
| YCL023C | YCL023C | 46.58 |
| YCL045C | YCL045C | 19.38 |
| YCR016W | YCR016W | 34.80 |
| YDC1    | YPL087W | 24.98 |
| YDL025C | YDL025C | 25.41 |
| YDR057W | YDR057W | 48.64 |
| YDR071C | YDR071C | 35.65 |
| YDR084C | YDR084C | 23.01 |
| YDR089W | YDR089W | 19.74 |
| YDR107C | YDR107C | 30.99 |
| YDR229W | YDR229W | 64.09 |
| YEL041W | YEL041W | 74.54 |
| YEL059W | YEL059W | 64.52 |
| YEL067C | YEL067C | 35.93 |
| YEL072W | YEL072W | 66.00 |
| YER071C | YER071C | 81.53 |
| YFR007W | YFR007W | 29.71 |
| YFR008W | YFR008W | 41.15 |
| YGL118C | YGL118C | 28.09 |
| YGL144C | YGL144C | 41.08 |
| YGL199C | YGL199C | 28.16 |
| YGR003W | YGR003W | 55.48 |
| YGR004W | YGR004W | 55.84 |
| YGR031W | YGR031W | 50.40 |
| YGR045C | YGR045C | 55.41 |
| YGR081C | YGR081C | 61.69 |
| YGR161C | YGR161C | 42.56 |
| YGR168C | YGR168C | 56.19 |
| YGR212W | YGR212W | 36.49 |
| YHL021C | YHL021C | 51.04 |
| YHP1    | YDR451C | 44.89 |
| YHR022C | YHR022C | 58.09 |
| YHR121W | YHR121W | 78.00 |
| YHR198C | YHR198C | 63.67 |
| YHR199C | YHR199C | 46.94 |
| YIL105C | YIL105C | 49.13 |
| YIL163C | YIL163C | 39.81 |
| YIL166C | YIL166C | 50.89 |
| YIR043C | YIR043C | 32.54 |
| YJL027C | YJL027C | 51.67 |
| YJL043W | YJL043W | 39.74 |
| YJL068C | YJL068C | 24.78 |
| YJL131C | YJL131C | 30.28 |
| YJL163C | YJL163C | 30.64 |
| YJL216C | YJL216C | 32.40 |
| YJR001W | YJR001W | 67.84 |

|           |           |       |
|-----------|-----------|-------|
| YJR079W   | YJR079W   | 20.82 |
| YJR080C   | YJR080C   | 41.65 |
| YKL090W   | YKL090W   | 19.20 |
| YKL102C   | YKL102C   | 32.47 |
| YKL151C   | YKL151C   | 25.13 |
| YKL177W   | YKL177W   | 37.73 |
| YKL222C   | YKL222C   | 28.45 |
| YKR033C   | YKR033C   | 23.15 |
| YKR064W   | YKR064W   | 24.00 |
| YKR078W   | YKR078W   | 37.76 |
| YLL014W   | YLL014W   | 19.91 |
| YLR072W   | YLR072W   | 28.09 |
| YLR073C   | YLR073C   | 34.45 |
| YLR089C   | YLR089C   | 41.72 |
| YLR194C   | YLR194C   | 51.95 |
| YLR199C   | YLR199C   | 25.27 |
| YLR262C-A | YLR262C-A | 23.29 |
| YLR279W   | YLR279W   | 33.53 |
| YLR312C   | YLR312C   | 52.02 |
| YLR324W   | YLR324W   | 44.47 |
| YLR326W   | YLR326W   | 31.84 |
| YLR352W   | YLR352W   | 36.71 |
| YLR404W   | YLR404W   | 44.33 |
| YLR413W   | YLR413W   | 48.07 |
| YLR455W   | YLR455W   | 54.14 |
| YML058C-A | YML058C-A | 30.85 |
| YML081W   | YML081W   | 42.92 |
| YMR029C   | YMR029C   | 47.51 |
| YMR102C   | YMR102C   | 45.88 |
| YMR188C   | YMR188C   | 57.46 |
| YMR258C   | YMR258C   | 26.54 |
| YMR310C   | YMR310C   | 56.75 |
| YNL056W   | YNL056W   | 24.92 |
| YNL122C   | YNL122C   | 18.45 |
| YNL134C   | YNL134C   | 48.64 |
| YNL140C   | YNL140C   | 38.89 |
| YNL157W   | YNL157W   | 26.89 |
| YNL187W   | YNL187W   | 47.79 |
| YOL037C   | YOL037C   | 24.28 |
| YOL054W   | YOL054W   | 39.67 |
| YOL070C   | YOL070C   | 44.68 |
| YOL071W   | YOL071W   | 20.40 |
| YOL099C   | YOL099C   | 19.84 |
| YOL106W   | YOL106W   | 31.84 |
| YOL125W   | YOL125W   | 37.55 |
| YOL155C   | YOL155C   | 50.12 |
| YOR108W   | YOR108W   | 18.35 |
| YOR129C   | YOR129C   | 20.40 |
| YOR271C   | YOR271C   | 44.96 |
| YOR277C   | YOR277C   | 27.53 |
| YOR300W   | YOR300W   | 37.06 |
| YPL030W   | YPL030W   | 39.80 |
| YPL095C   | YPL095C   | 59.36 |
| YPL103C   | YPL103C   | 42.28 |
| YPL105C   | YPL105C   | 44.75 |

|         |         |       |
|---------|---------|-------|
| YPL108W | YPL108W | 50.89 |
| YPR015C | YPR015C | 44.05 |
| YPR031W | YPR031W | 57.53 |
| YPR096C | YPR096C | 31.55 |
| YSR3    | YKR053C | 45.95 |

**Additional gene deletion strains of interest**

|        |         |
|--------|---------|
| AAC3   | YBR085W |
| ABC1   | YGL119W |
| ARE1   | YCR048W |
| ARO2   | YGL148W |
| AUS1   | YOR011W |
| CCP1   | YKR066C |
| COR1   | YBL045C |
| COX15  | YER141W |
| COX18  | YGR062C |
| COX5B  | YIL111W |
| COX9   | YDL067C |
| CTA1   | YDR256C |
| CTT1   | YGR088W |
| DAN1   | YJR150C |
| ELC1   | YPL046C |
| FCY22  | YER060W |
| FET3   | YMR058W |
| FUN34  | YNR002C |
| HLR1   | YDR528W |
| HMG2   | YLR450W |
| IDP2   | YLR174W |
| LYS20  | YDL182W |
| MDM31  | YHR194W |
| MIC14  | YDR031W |
| NCE103 | YNL036W |
| NDI1   | YML120C |
| PAU1   | YJL223C |
| PAU2   | YEL049W |
| PAU23  | YLR037C |
| PAU24  | YBR301W |
| PAU3   | YCR104W |
| PAU5   | YFL020C |
| PFK1   | YGR240C |
| PFK2   | YMR205C |
| PRD1   | YCL057W |
| PUG1   | YER185W |
| QCR8   | YJL166W |
| RHR2   | YIL053W |
| RPP1A  | YDL081C |
| RTA1   | YGR213C |
| SIM1   | YIL123W |
| SLM1   | YIL105C |
| SPE2   | YOL052C |
| TDA3   | YHR009C |
| TIR1   | YER011W |
| TIR4   | YOR009W |

|         |         |
|---------|---------|
| TRX3    | YCR083W |
| VPS65   | YLR322W |
| YBR235W | YBR235W |
| YFR017C | YFR017C |
| YHB1    | YGR234W |
| YIG1    | YPL201C |
| YOL024W | YOL024W |
| YPL041C | YPL041C |
